# Supplementary material for: Use of dedicated gene panel sequencing using next generation sequencing to improve the personalized care of lung cancer
Source: PubMed Central journal article supplement (PMC5029748; doi:10.18632/oncotarget.8391), 2016-03-26
Supplement: oncotarget-07-24860-s001.pdf [file oncotarget-07-24860-s001.pdf]

## Use of dedicated gene panel sequencing using next generation sequencing to improve the personalized care of lung cancer

### Supplementary Material

**Supplementary Table 1: List of mutations with biological annotations**

| Genes  | Exons   | Protein variation | Impact               | Detected in routine analysis | Confirmed by classical technics |
|--------|---------|-------------------|----------------------|------------------------------|---------------------------------|
|        |         |                   |                      | In routine lab               | In the NGS facility             |
| AKT1   | 3       | IVS2-1            | Unknown              | No                           | Not tested                      |
|        |         | L28F              | Unknown              | No                           | Nos tested                      |
| ALK    | 23      | P1213S            | Unknown              | No                           | Yes                             |
|        | 25      | /                 | /                    | /                            | /                               |
|        |         | R1279K            | Unknown              | No                           | Yes                             |
| APC    | 16      | R727S             | Unknown              | No                           | Not tested                      |
|        |         | S874A             | Unknown              | No                           | Not tested                      |
|        |         | S900A             | Unknown              | No                           | Not tested                      |
|        |         | S948P (*2)        | Unknown              | No                           | Not tested                      |
|        |         | L1029F            | Unknown              | No                           | Not tested                      |
|        |         | P1052S            | Unknown              | No                           | Not tested                      |
|        |         | L1129S            | Loss of function (1) | No                           | Not tested                      |
|        |         | E1242G            | Unknown              | No                           | Not tested                      |
|        |         | E1353A            | Unknown              | No                           | Not tested                      |
|        |         | D1498Y            | Unknown              | No                           | Not tested                      |
|        |         | D1512N            | Unknown              | No                           | Not tested                      |
|        |         | V1822D (H/O)      | SNP                  | No                           | Not tested                      |
|        |         | T1932I            | Unknown              | No                           | Not tested                      |
| P2170L | Unknown | No                | Not tested           |                              |                                 |

|        |       |                   |                      |     |            |
|--------|-------|-------------------|----------------------|-----|------------|
|        |       | V2414I            | Unknown              | No  | Not tested |
|        |       | G2502S            | Benign (2)           | No  | Not tested |
|        |       | S2578L            | Unknown              | No  | Not tested |
|        |       | S2799A            | Unknown              | No  | Not tested |
| ARAF   | 7     | /                 | /                    | No  | Not tested |
|        | 8     | /                 | /                    | No  | Not tested |
|        | 11    | /                 | /                    | No  | Not tested |
|        | 15    | /                 | /                    | No  | Not tested |
| BRAF   | 11    | G466E             | Loss of function (3) | No  | Yes        |
|        | 15    | D594N             | Loss of function (4) | No  | Yes        |
|        |       | V600E             | Activation (5)       | Yes | Yes        |
| CRAF   | 7     | /                 | /                    | /   | /          |
|        | 11    | /                 | /                    | /   | /          |
|        | 15    | /                 | /                    | /   | /          |
| CTNNB1 | 3     | /                 | /                    | /   | /          |
| DPYD   | 23    | T981I             | Unknown              | No  | Nos tested |
| ERCC1  | 7     | /                 | /                    | /   | /          |
|        | 10    | /                 | /                    | /   | /          |
| EGFR   | 18    | P699S             | Unknown              | No  | Yes        |
|        | 19    | G735S             | Activation (6)       | No  | Yes        |
|        |       | E746_E749del      | Activation (7)       | Yes | Yes        |
|        |       | E746_A750del (*8) | Activation (8)       | Yes | Yes        |
|        |       | A747_T751del      | Activation (8)       | Yes | Yes        |
|        |       | A747_P753del_Sins | Activation (8)       | Yes | Yes        |
|        |       | T751I             | Activation (9)       | No  | Yes        |
| 20     | M766L | Unknown           | No                   | Yes |            |

|       |    |                                            |                                                                |                        |                          |
|-------|----|--------------------------------------------|----------------------------------------------------------------|------------------------|--------------------------|
|       | 21 | T790M (*2)<br>E828S<br>R831H<br>L858R (*4) | Activation (10)<br>Unknown<br>Activation (7)<br>Activation (8) | Yes<br>No<br>No<br>Yes | Yes<br>Yes<br>Yes<br>Yes |
| ERBB2 | 20 | /                                          | /                                                              | /                      | /                        |
| FGFR1 | 4  | /                                          | /                                                              | /                      | /                        |
|       | 5  | /                                          | /                                                              | /                      | /                        |
| FGFR2 | 7  | /                                          | /                                                              | /                      | /                        |
|       | 12 | /                                          | /                                                              | /                      | /                        |
| FGFR3 | 16 | /                                          | /                                                              | /                      | /                        |
| FGFR4 | 2  | /                                          | /                                                              | /                      | /                        |
|       | 5  | /                                          | /                                                              | /                      | /                        |
|       | 11 | /                                          | /                                                              | /                      | /                        |
|       | 14 | /                                          | /                                                              | /                      | /                        |
|       | 16 | /                                          | /                                                              | /                      | /                        |
| FLT1  | 19 | A897V                                      | Unknown                                                        | No                     | Not tested               |
|       | 24 | /                                          | /                                                              | /                      | /                        |
|       | 30 | /                                          | /                                                              | /                      | /                        |
| HRAS  | 2  | /                                          | /                                                              | /                      | /                        |
|       | 3  | Q99H                                       | Unknown                                                        | No                     | Not tested               |
|       | 4  | /                                          | /                                                              | /                      | /                        |
| IGF1R | 2  | /                                          | /                                                              | /                      | /                        |
|       | 5  | /                                          | /                                                              | /                      | /                        |
|       | 6  | /                                          | /                                                              | /                      | /                        |
|       | 7  | /                                          | /                                                              | /                      | /                        |
|       | 8  | /                                          | /                                                              | /                      | /                        |
|       | 19 | /                                          | /                                                              | /                      | /                        |

|        |    |             |                           |            |            |
|--------|----|-------------|---------------------------|------------|------------|
|        | 20 | /           | /                         | /          | /          |
| JAK2   | 12 | /           | /                         | /          | /          |
|        | 14 | /           | /                         | /          | /          |
|        | 16 | /           | /                         | /          | /          |
| JAK3   | 5  | /           | /                         | /          | /          |
|        | 11 | /           | /                         | /          | /          |
|        | 12 | /           | /                         | /          | /          |
|        | 15 | /           | /                         | /          | /          |
| KDR    | 7  | V297I (H)   | Loss of function SNP (11) | No         | Not tested |
|        | 11 | Q472H (H/O) | Gain of function SNP (12) | No         | Not tested |
|        |    | C482R (H)   | SNP                       | No         | Not tested |
|        |    | A505T       | Unknown                   | No         | Not tested |
|        | 16 | G756D       | Unknown                   | No         | Not tested |
|        |    | T771M       | Unknown                   | No         | Not tested |
|        | 24 | P1074T      | Unknown                   | No         | Not tested |
|        | 30 | A1295V      | Unknown                   | No         | Not tested |
| P1354S |    | Unknown     | No                        | Not tested |            |
| KIT    | 9  | /           | /                         | /          | /          |
|        | 10 | M541L       | SNP (13)                  | No         | Yes        |
|        | 11 | Q575X       | Loss of function          | No         | Yes        |
|        | 12 | T594I       | Unknown                   | No         | Yes        |
|        | 13 | H630Y       | Unknown                   | No         | Yes        |
|        |    | H650N       | Unknown                   | No         | Yes        |
|        | 17 | I789T       | Unknown                   | No         | Yes        |
|        |    | A814V       | Unknown                   | No         | Yes        |
| KRAS   | 2  | G12A        | Activation (14)           | Yes        | Yes        |
|        |    | G12C (*2)   | Activation (14)           | Yes        | Yes        |

|        |    |        |                 |     |            |
|--------|----|--------|-----------------|-----|------------|
|        |    | G12V   | Activation (14) | Yes | Yes        |
|        |    | G13C   | Activation (14) | Yes | Yes        |
|        | 3  | R68G   | Unknown         | No  | Yes        |
|        | 4  | /      | /               | /   | /          |
| MAP2K1 | 2  | P89L   | Unknown         | No  | Not tested |
|        | 3  | /      | /               | /   | Not tested |
|        | 6  | /      | /               | /   | Not tested |
|        | 7  | P232L  | Unknown         | No  | Not tested |
|        |    | P237R  | Unknown         | No  | Not tested |
|        | 11 | /      | /               | /   | /          |
| MAP2K2 | 1  | /      | /               | /   | /          |
|        | 2  | /      | /               | /   | /          |
| MAP2K4 | 3  | IVS2-1 | Unknown         | No  | Not tested |
|        | 4  | /      | /               | /   | /          |
|        | 5  | /      | /               | /   | /          |
|        | 8  | R285S  | Unknown         | No  | Not tested |
|        |    | D289G  | Unknown         | No  | Not tested |
|        | 9  | /      | /               | /   | /          |
| MET    | 14 | R988C  | SNP (15)        | No  | Yes        |
|        |    | T1010I | SNP (15)        | No  | Yes        |
|        | 16 | /      | /               | /   | /          |
|        | 17 | /      | /               | /   | /          |
|        | 18 | /      | /               | /   | /          |
|        | 19 | /      | /               | /   | /          |
| NRAS   | 2  | /      | /               | /   | /          |
|        | 3  | /      | /               | /   | /          |
|        | 4  | P110L  | Unknown         | No  | Not tested |

|         |    |             |                               |    |            |
|---------|----|-------------|-------------------------------|----|------------|
| PDGFRA  | 12 | R554S       | Unknown                       | No | Not tested |
|         |    | R555C       | Activation (16)               | No | Not tested |
|         | 14 | M642I       | Unknown                       | No | Not tested |
|         | 18 | /           | /                             | /  | /          |
| PDK1    | 2  | /           | /                             | /  | /          |
|         | 5  | /           | /                             | /  | /          |
|         | 10 | /           | /                             | /  | /          |
|         | 11 | /           | /                             | /  | /          |
| PIK3CA  | 9  | IVS9+1      | /                             | No | Yes        |
|         | 20 | H994Y       | Unknown                       | No | Yes        |
| PTEN    | 3  | K62TfsX34   | Loss of function (stop codon) | No | Not tested |
|         | 5  | R159K       | Loss of function (17)         | No | Not tested |
|         | 6  | E201K       | Unknown                       | No | Not tested |
|         | 7  | S229X       | Loss of function (stop codon) | No | Not tested |
| RB1     | 11 | K359R       | Unknown                       | No | Not tested |
|         | 20 | L694X       | Loss of function (stop codon) | No | Not tested |
| SLC28A1 | 7  | V189I (H/O) | Loss of function SNP (18)     | No | Not tested |
| SLC29A1 | 9  | V291I       | Unknown                       | No | Not tested |
|         | 10 | /           | /                             | /  | /          |
| SMAD4   | 10 | /           | /                             | /  | /          |
|         | 11 | V437I       | Unknown                       | No | Not tested |
|         |    | A460T       | Unknown                       | No | Not tested |
| SPARC   | 5  | /           | /                             | /  | /          |
|         | 6  | /           | /                             | /  | /          |
|         | 7  | K191R       | Unknown                       | No | Not tested |
|         | 9  | T266S       | Unknown                       | No | Not tested |
|         |    | Y288H       | Unknown                       | No | Not tested |

|       |       |                       |                               |     |            |
|-------|-------|-----------------------|-------------------------------|-----|------------|
| SRC   | 14    | /                     | /                             | /   | /          |
| STK11 | 4     | /                     | /                             | /   | /          |
|       | 5     | L201AfsX6             | Loss of function (stop codon) | No  | Not tested |
|       |       | H202R                 | Unknown                       | No  | Not tested |
|       | 6     | E256X                 | Loss of function (stop codon) | No  | Not tested |
|       |       | G279AfsX8             | Loss of function (stop codon) | No  | Not tested |
|       | 8     | R333C                 | Unknown                       | No  | Not tested |
| TP53  | 4     | IVS4+1                | Unknown                       | No  | Yes        |
|       |       | R72P                  | SNP (19)                      | No  | Yes        |
|       |       | W91R                  | Loss of function (19)         | No  | Yes        |
|       | 5     | P142VfsX28            | Loss of function (stop codon) | No  | Yes        |
|       |       | G144X                 | Loss of function (stop codon) | No  | Yes        |
|       |       | R158L                 | Loss of function (19)         | No  | Yes        |
|       |       | Y163C                 | Loss of function (19)         | No  | Yes        |
|       |       | C176F                 | Loss of function (19)         | No  | Yes        |
|       |       | S183X                 | Loss of function (stop codon) | No  | Yes        |
|       | 6     | G187R                 | Loss of function (19)         | No  | Yes        |
|       |       | P191L                 | Loss of function (19)         | No  | Yes        |
|       |       | V216M                 | Loss of function (19)         | No  | Yes        |
|       |       | Y220C (*3)            | Loss of function (19)         | No  | Yes        |
|       |       | Y220X                 | Loss of function (stop codon) | No  | Yes        |
|       | 7     | I232N                 | Loss of function (19)         | No  | Yes        |
|       |       | Y234C                 | Loss of function (19)         | No  | Yes        |
|       |       | R248W                 | Loss of function (19)         | No  | Yes        |
|       |       | R249G                 | Loss of function (19)         | No  | Yes        |
|       |       | E258K (*2)            | Loss of function (19)         | No  | Yes        |
| 8     | R273C | Loss of function (19) | No                            | Yes |            |

|      |   |            |                               |    |     |
|------|---|------------|-------------------------------|----|-----|
|      |   | V274F      | Loss of function (19)         | No | Yes |
|      |   | R282W      | Loss of function (19)         | No | Yes |
|      | 9 | K319RfsX27 | Loss of function (stop codon) | No | Yes |
|      |   | D324N      | Loss of function (19)         | No | Yes |
| TYMS | 4 | /          | /                             | /  | /   |
|      | 5 | /          | /                             | /  | /   |
|      | 6 | /          | /                             | /  | /   |

1. Lefevre et al., Journal of Human Genetics – 2012
2. Schlussek et al., Case Reports in Medicine – 2014
3. Wan et al., Cell – 2004
4. Heidorn et al., Cell – 2010
5. Davies et al., Nature – 2002
6. Cai et al., Oncogene – 2008
7. Yang et al., JCO - 2008
8. Lynch et al., NEJM – 2004
9. Tsao et al., NEJM – 2005
10. Kobayashi et al., NEJM – 2005
11. Tao et al., J Biol Chem - 2001
12. Glubb et al., Clin Cancer Res – 2011
13. Krüger et al., Leukemia – 2006
14. Scheffzek et al., Science – 1997
15. Tyner et al., Cancer Res – 2010
16. de Raedt et al., Gastroenterology – 2006
17. Cecener et al., Cell Mol Neurobiol – 2009
18. Gray et al., Mol Pharmacol – 2004



19. Petitjean *et al.*, Human Mutation - 2007
